# Supplementary material
Source: Elsevier journal article supplement (https://www.sciencedirect.com/science/article/pii/S1885585719300507)
Supplement: mmc1 [file S1885585719300507:mmc1.pdf]

## MATERIAL SUPLEMENTARIO

### Tabla

Preguntas realizadas en la visita del estudio relativas a antecedentes de consulta por palpitaciones y dolor torácico

|                                                                                                                                                                                         | Sí                                     | No                       | NS/NC                    |
|-----------------------------------------------------------------------------------------------------------------------------------------------------------------------------------------|----------------------------------------|--------------------------|--------------------------|
| (44) <b>¿Ha consultado con anterioridad por palpitaciones?</b>                                                                                                                          | <input type="checkbox"/>               | <input type="checkbox"/> | <input type="checkbox"/> |
| <b>En caso afirmativo, con quién:</b>                                                                                                                                                   |                                        |                          |                          |
| (45) <i>Médico de AP</i>                                                                                                                                                                | <input type="checkbox"/>               | <input type="checkbox"/> | <input type="checkbox"/> |
| (46) <i>Cardiólogo</i>                                                                                                                                                                  | <input type="checkbox"/>               | <input type="checkbox"/> | <input type="checkbox"/> |
| (47) <i>Servicios de urgencias del hospital</i>                                                                                                                                         | <input type="checkbox"/>               | <input type="checkbox"/> | <input type="checkbox"/> |
| Con motivo de esa consulta:                                                                                                                                                             |                                        |                          |                          |
| (48) Me realizaron un electrocardiograma                                                                                                                                                | <input type="checkbox"/>               | <input type="checkbox"/> | <input type="checkbox"/> |
| (49) Me realizaron un ecocardiograma                                                                                                                                                    | <input type="checkbox"/>               | <input type="checkbox"/> | <input type="checkbox"/> |
| (50) Me remitieron al cardiólogo                                                                                                                                                        | <input type="checkbox"/>               | <input type="checkbox"/> | <input type="checkbox"/> |
| (51) Me realizaron pruebas que no son del corazón                                                                                                                                       | <input type="checkbox"/>               | <input type="checkbox"/> | <input type="checkbox"/> |
| (52) Me ingresaron                                                                                                                                                                      | <input type="checkbox"/>               | <input type="checkbox"/> | <input type="checkbox"/> |
| (53) Me introdujeron o cambiaron el tratamiento                                                                                                                                         | <input type="checkbox"/>               | <input type="checkbox"/> | <input type="checkbox"/> |
| (54) Me diagnosticaron                                                                                                                                                                  | <input type="checkbox"/>               | <input type="checkbox"/> | <input type="checkbox"/> |
| (55) <b>¿Cuántas veces ha consultado con anterioridad por palpitaciones y/o mareo?</b> (número aproximado total con cualquier agente: médico de AP, cardiólogo o servicio de urgencias) | _____                                  |                          |                          |
| (56-57) <b>¿Cuándo empezó a consultar por palpitaciones y/o mareo?</b> (introducir fecha aproximada)                                                                                    | ___ / ___ / ___<br>(56) mes / (57) año |                          |                          |
|                                                                                                                                                                                         | Sí                                     | No                       | NS/NC                    |
| (68) <b>¿Ha consultado con anterioridad por dolor en el pecho?</b>                                                                                                                      | <input type="checkbox"/>               | <input type="checkbox"/> | <input type="checkbox"/> |
| <b>En caso afirmativo, con quién:</b>                                                                                                                                                   |                                        |                          |                          |
| (69) <i>Médico de AP</i>                                                                                                                                                                | <input type="checkbox"/>               | <input type="checkbox"/> | <input type="checkbox"/> |
| (70) <i>Cardiólogo</i>                                                                                                                                                                  | <input type="checkbox"/>               | <input type="checkbox"/> | <input type="checkbox"/> |
| (71) <i>Servicios de urgencias del hospital</i>                                                                                                                                         | <input type="checkbox"/>               | <input type="checkbox"/> | <input type="checkbox"/> |
| Con motivo de esa consulta:                                                                                                                                                             |                                        |                          |                          |
| (72) Me realizaron un electrocardiograma                                                                                                                                                | <input type="checkbox"/>               | <input type="checkbox"/> | <input type="checkbox"/> |
| (73) Me realizaron un ecocardiograma                                                                                                                                                    | <input type="checkbox"/>               | <input type="checkbox"/> | <input type="checkbox"/> |
| (74) Me remitieron al cardiólogo                                                                                                                                                        | <input type="checkbox"/>               | <input type="checkbox"/> | <input type="checkbox"/> |
| (75) Me realizaron pruebas que no son del corazón                                                                                                                                       | <input type="checkbox"/>               | <input type="checkbox"/> | <input type="checkbox"/> |
| (76) Me ingresaron                                                                                                                                                                      | <input type="checkbox"/>               | <input type="checkbox"/> | <input type="checkbox"/> |
| (77) Me introdujeron o cambiaron el tratamiento                                                                                                                                         | <input type="checkbox"/>               | <input type="checkbox"/> | <input type="checkbox"/> |
| (78) Me diagnosticaron                                                                                                                                                                  | <input type="checkbox"/>               | <input type="checkbox"/> | <input type="checkbox"/> |
| (79) <b>¿Cuántas veces ha consultado con anterioridad por dolor en el pecho?</b> (número aproximado total con cualquier agente: médico de AP, cardiólogo o servicio de urgencias)       | _____                                  |                          |                          |
| (80-81) <b>¿Cuándo empezó a consultar por dolor en el pecho?</b> (introducir fecha aproximada)                                                                                          | ___ / ___ / ___<br>(80) mes / (81) año |                          |                          |
